# Supplementary material for: Telemedicine Technologies Selection for the Posthospital Patient Care Process after Total Hip Arthroplasty
Source: Int J Environ Res Public Health. 2022 Sep 13;19(18):11521. doi: 10.3390/ijerph191811521 (PMC9517262; doi:10.3390/ijerph191811521)
Supplement: Supplementary file 1 [file ijerph-19-11521-s001.zip › File S1.pdf]

## File S1 - Database search strategy

Database: **Embase** <1974 to 2022 Week 17>

Search Strategy:

---

- 1 exp telehealth/ or (e?health or tele?health).ti,ab,kf. or exp telemedicine/ or tele?medicine.ti,ab,kf. or telerehabilitation/ or ((e-rehabilitation or remote rehabilitation or tele?rehabilitation or virtual) adj2 rehabilitation).ti,ab,kf. or telemonitoring/ or (tele?monitoring or distant patient monitoring or remote patient monitoring).ti,ab,kf. or teleconsultation/ or ((remote consultation or tele-consultation or telephone) adj6 consultation).ti,ab,kf. or exp videoconferencing/ or (((videoconference or video) adj3 conference) or video conferencing).ti,ab,kf. (82128)
- 2 exp hip replacement/ or (hip replacement or hip replacement arthroplasty or hip joint replacement\$1).ti,ab,kf. or exp total hip replacement/ or (total hip replacement or total replacement hip arthroplasty or hip total replacement arthroplasty or hip total arthroplasty).ti,ab,kf. or exp hip/ or hip joint\$1.ti,ab,kf. or exp hip osteoarthritis/ or (hip arthrosis or hip joint arthrosis or hip osteo?arthritis or hip osteo?arthrosis or hip osteoarthritis).ti,ab,kf. or exp hip prosthesis/ or (hip prosthesis\$2 or hip joint prosthesis or hip joint prosthesis or hip prostheses or hip implant).ti,ab,kf. or exp postoperative care/ or (postoperative care or postoperative therap\$3 or postoperative treatment\$1).ti,ab,kf. (275999)
- 3 "Preferred Reporting Items for Systematic Reviews and Meta-Analyses"/ or "systematic review"/ or systematic review.ti. or randomized controlled trial/ or clinical trial/ or (clinical adj1 trial\*).ti,ab,kf. or systematic search\*.ti,ab,kf. (2136518)
- 4 and/1-2 (621)
- 5 and/3-4 (126)
- 6 conference.pt. (5121210)
- 7 5 not 6 (107)
- 8 limit 7 to yr="2012 - 2022" (100)

## File S1 - Database search strategy

Database: **PUBMED**

Search Strategy:

---

"Hip Joint/surgery"[mh] OR "Hip Joint"[mh] OR "hip joint\*"[tiab] OR "arthroplasty, replacement, hip"[mh] OR "hip replacement\*"[tiab] OR „Hip Prosthesis Implantation"[tiab] OR „Hip Replacement Arthroplast"[tiab] OR "Total Hip Replacement\*"[tiab] OR "Total Hip Arthroplasty"[tiab] OR "osteoarthritis, hip"[mh] OR "hip osteoarthritis"[tiab] OR Coxarthrosis[tiab] OR Coxarthroses[tiab]

AND

Telerehabilitation[mh] OR Telerehabilitation\*[tiab] OR "Tele-rehabilitation\*"[tiab] OR "Remote Rehabilitation\*"[tiab] OR "Virtual Rehabilitation\*"[tiab] OR telemedicine[mh] OR telemedicine[tiab] OR „Mobile Health"[tiab] OR mHealth[tiab] OR Telehealth[tiab] OR eHealth[tiab] OR "remote consultation\*"[tiab] OR "teleconsultation\*"[tiab] OR "distance counseling"[mh] OR "distance counsel\*"[tiab] OR "E-Therapy"[tiab] OR "E Therapy"[tiab] OR "E-Counseling"[tiab] OR "E Counseling"[tiab] OR "ehealth"[tiab] OR "telerehabilitation"[tiab] OR "telemonitoring"[tiab] OR telerehabilitation[mh] OR "Videoconferencing"[mh] OR "Remote Consultation"[mh] OR "telemedicine"[mh] OR "teleconsultation"[tiab] OR "telehealth"[tiab]

All strategy:

(Telerehabilitation[mh] OR Telerehabilitation\*[tiab] OR "Tele-rehabilitation\*"[tiab] OR "Remote Rehabilitation\*"[tiab] OR "Virtual Rehabilitation\*"[tiab] OR telemedicine[mh] OR telemedicine[tiab] OR „Mobile Health"[tiab] OR mHealth[tiab] OR Telehealth[tiab] OR eHealth[tiab] OR "remote consultation\*"[tiab] OR "teleconsultation\*"[tiab] OR "distance counseling"[mh] OR "distance counsel\*"[tiab] OR "E-Therapy"[tiab] OR "E Therapy"[tiab] OR "E-Counseling"[tiab] OR "E Counseling"[tiab] OR "ehealth"[tiab] OR "telerehabilitation"[tiab] OR "telemonitoring"[tiab] OR telerehabilitation[mh] OR "Videoconferencing"[mh] OR "Remote Consultation"[mh] OR "telemedicine"[mh] OR "teleconsultation"[tiab] OR "telehealth"[tiab]) AND ((("Hip Joint/surgery"[mh] OR "Hip Joint"[mh] OR "hip joint\*"[tiab] OR "arthroplasty, replacement, hip"[mh] OR "hip replacement\*"[tiab] OR „Hip Prosthesis Implantation"[tiab] OR „Hip Replacement Arthroplast"[tiab] OR "Total Hip Replacement\*"[tiab] OR "Total Hip Arthroplasty"[tiab] OR "osteoarthritis, hip"[mh] OR "hip osteoarthritis"[tiab] OR Coxarthrosis[tiab] OR Coxarthroses[tiab])) Sort by: Publication Date

## File S1 - Database search strategy

Database: **PEDro**

Search Strategy:

**Table S1.** Search strategy at PEDro database.

| 1st word            | 2nd word               | Results |
|---------------------|------------------------|---------|
| ehealth             | total hip arthroplasty | 1       |
| telemedicine        |                        | 0       |
| telerehabilitation  |                        | 2       |
| telemonitoring      |                        | 0       |
| teleconsultation    |                        | 0       |
| remote consultation |                        | 0       |
| ehealth             | hip replacement        | 0       |
| telemedicine        |                        | 0       |
| telerehabilitation  |                        | 4       |
| telemonitoring      |                        | 0       |
| teleconsultation    |                        | 0       |
| remote consultation |                        | 0       |
| ehealth             | hip joint              | 0       |
| telemedicine        |                        | 0       |
| telerehabilitation  |                        | 0       |
| telemonitoring      |                        | 0       |
| teleconsultation    |                        | 0       |
| remote consultation |                        | 0       |
| ehealth             | hip osteoarthritis     | 1       |
| telemedicine        |                        | 0       |
| telerehabilitation  |                        | 3       |
| telemonitoring      |                        | 0       |
| teleconsultation    |                        | 0       |
| remote consultation |                        | 0       |
| ehealth             | postoperative care     | 2       |
| telemedicine        |                        | 0       |
| telerehabilitation  |                        | 2       |
| telemonitoring      |                        | 0       |
| teleconsultation    |                        | 0       |
| remote consultation |                        | 0       |
